# Supplementary material
Source: PubMed Central journal article supplement (PMC4516594)

**Figure S1. Bivariate Correlations between Adiponectin and Selected Laboratory Test and Body Composition Surrogates in Maintenance Hemodialysis Patients.**

Outer black lines and grey areas indicate boundaries of 95% CIs.

**A. Adiponectin and HDL**

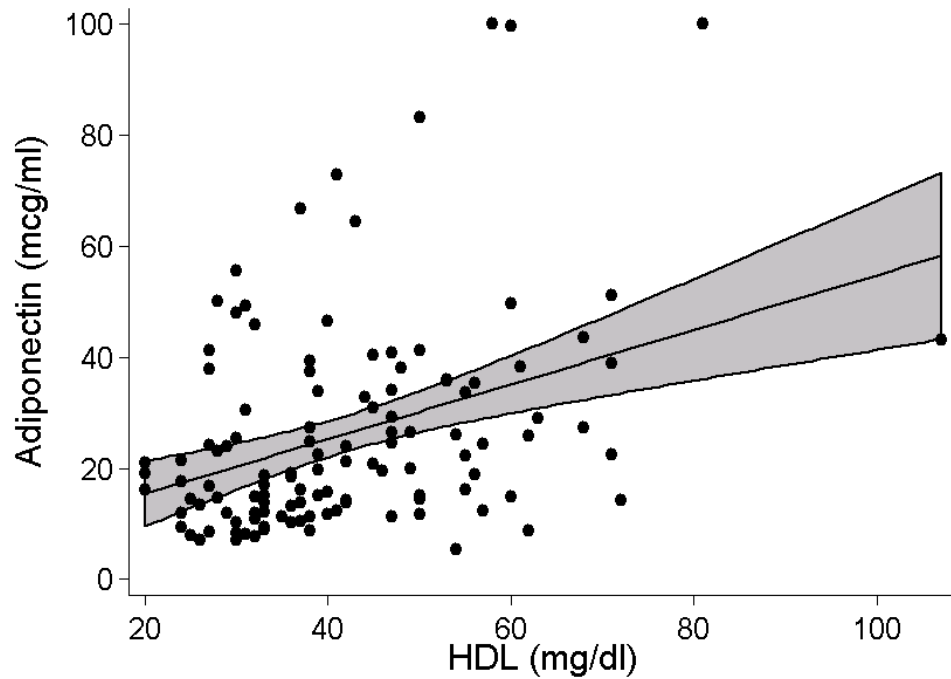

**B. Adiponectin and triglycerides**

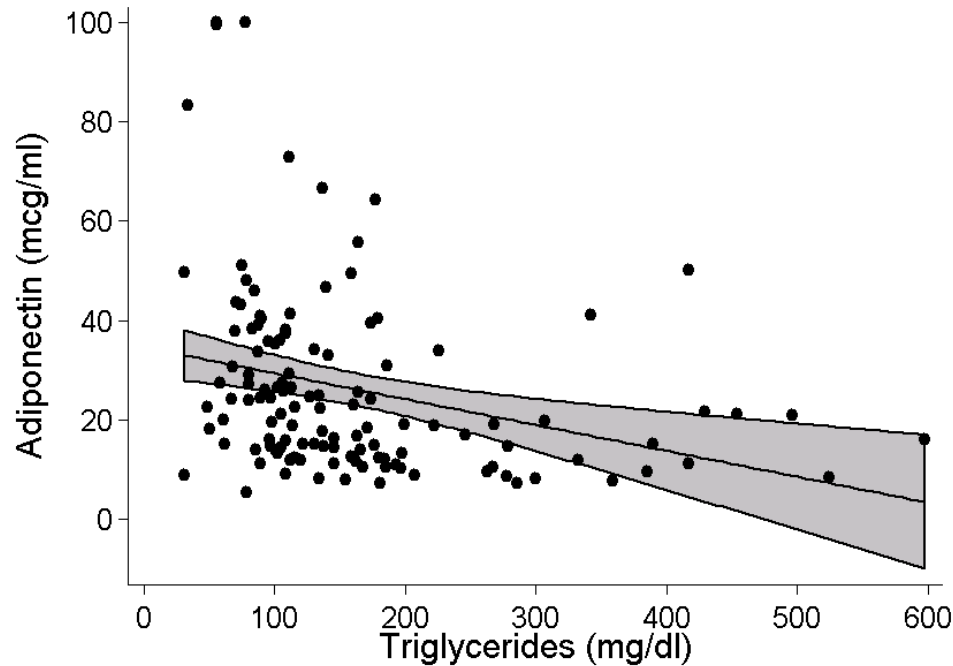

**C. Adiponectin and BMI**

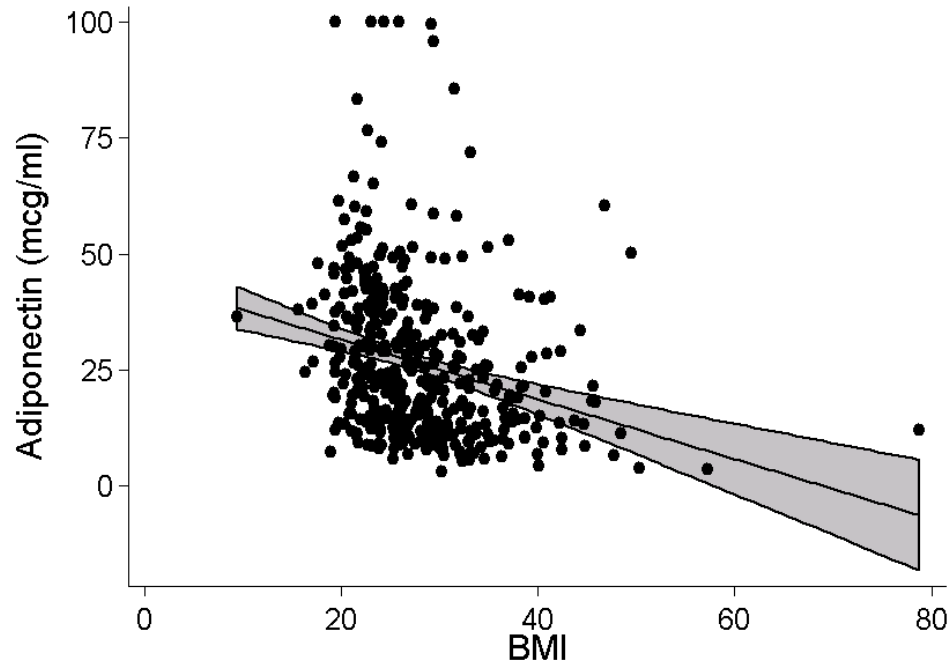

**D. Adiponectin and waist circumference**

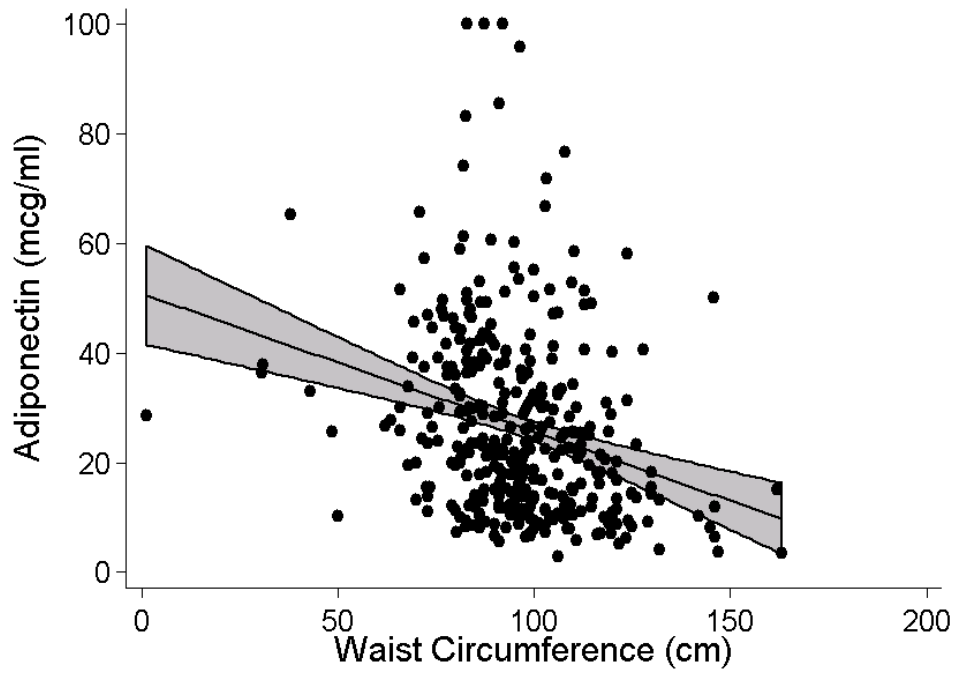

Supplement: NIHMS668562-supplement-1.pdf [file NIHMS668562-supplement-1.pdf]
