# Supplementary material
Source: PubMed Central journal article supplement (PMC4516594)
Supplement: NIHMS668562-supplement-2.pdf [file NIHMS668562-supplement-2.pdf]

**Table S1. Baseline Characteristics Among Maintenance Hemodialysis Patients With vs. Without Missing Data on  $\geq 1$  Covariate(s).**

|                                           | MODEL 3           |                  |         | MODEL 4           |                   |         | MODEL 5           |                   |         |
|-------------------------------------------|-------------------|------------------|---------|-------------------|-------------------|---------|-------------------|-------------------|---------|
|                                           | Non-Missing       | Missing          | p-value | Non-Missing       | Missing           | p-value | Non-Missing       | Missing           | p-value |
| No. of patients                           | 356               | 145              | N/A     | 112               | 389               | N/A     | 243               | 258               | N/A     |
| Adiponectin level, mean $\pm$ SD (mcg/ml) | 26.7 $\pm$ 18.3   | 27.5 $\pm$ 15.7  | 0.6     | 25.7 $\pm$ 18.2   | 27.2 $\pm$ 17.4   | 0.4     | 26.1 $\pm$ 18.0   | 27.7 $\pm$ 17.2   | 0.3     |
| Age (years)                               | 56.6 $\pm$ 14.5   | 51.7 $\pm$ 15.4  | <0.001  | 55.5 $\pm$ 14.0   | 55.1 $\pm$ 15.2   | 0.8     | 55.0 $\pm$ 14.1   | 55.3 $\pm$ 15.7   | 0.8     |
| Vintage (years)                           | 3.6 (1.5, 6.2)    | 3.0 (1.3, 6.3)   | 0.3     | 3.1 (1.3, 6.1)    | 3.5 (1.6, 6.3)    | 0.3     | 3.5 (1.5, 6.0)    | 3.3 (1.5, 6.5)    | >0.9    |
| Female                                    | 44.9% (160)       | 40.0% (58)       | 0.3     | 45.5% (51)        | 42.9% (167)       | 0.6     | 42.4% (103)       | 44.6% (115)       | 0.6     |
| Black race                                | 47.5% (169)       | 21.4% (31)       | <0.001  | 44.6% (50)        | 38.6% (150)       | 0.2     | 45.3% (110)       | 34.9% (90)        | 0.02    |
| Hispanic ethnicity                        | 36.0% (128)       | 68.3% (99)       | <0.001  | 44.6% (50)        | 45.5% (177)       | 0.9     | 34.6% (84)        | 55.4% (143)       | <0.001  |
| Diabetes                                  | 47.8% (170)       | 45.5% (66)       | 0.6     | 50.0% (56)        | 46.3% (180)       | 0.5     | 40.3% (98)        | 53.5% (138)       | 0.003   |
| AVF/AVG                                   | 51.7% (184)       | 51.0% (74)       | 0.9     | 50.0% (56)        | 51.9% (202)       | 0.7     | 50.6% (123)       | 52.3% (135)       | 0.7     |
| Smoking                                   | 37.6% (134)       | 32.4% (47)       | 0.3     | 32.1% (36)        | 37.3% (145)       | 0.3     | 40.7% (99)        | 31.8% (82)        | 0.04    |
| <b>LABORATORY TESTS</b>                   |                   |                  |         |                   |                   |         |                   |                   |         |
| <b>Median (IQR)</b>                       |                   |                  |         |                   |                   |         |                   |                   |         |
| Serum albumin (g/dl)                      | 4.0 (3.8, 4.2)    | 4.1 (3.8, 4.2)   | 0.8     | 4.0 (3.8, 4.3)    | 4.0 (3.8, 4.2)    | 0.4     | 4.1 (3.8, 4.3)    | 3.9 (3.7, 4.2)    | 0.003   |
| Creatinine (mg/dl)                        | 9.4 (7.5, 11.6)   | 8.8 (7.1, 11.0)  | 0.2     | 9.3 (7.3, 11.5)   | 9.3 (7.6, 11.5)   | 0.9     | 9.6 (7.7, 11.8)   | 8.7 (7.2, 11.0)   | 0.03    |
| Calcium <sup>2</sup> (mg/dl)              | 9.2 (8.8, 9.6)    | 9.1 (8.7, 9.5)   | 0.5     | 9.1 (8.7, 9.5)    | 9.2 (8.8, 9.6)    | 0.4     | 9.2 (8.7, 9.6)    | 9.2 (8.8, 9.6)    | 0.6     |
| Phosphorus (mg/dl)                        | 4.9 (4.1, 6.1)    | 4.8 (3.9, 5.6)   | 0.4     | 4.9 (4.1, 6.0)    | 4.9 (4.1, 6.1)    | >0.9    | 4.8 (4.1, 6.1)    | 4.9 (4.0, 6.0)    | 0.7     |
| PTH (pg/ml)                               | 353 (225, 558)    | 362 (232, 492)   | 0.8     | 335 (212, 556)    | 360 (230, 556)    | 0.5     | 388 (240, 618)    | 335 (205, 500)    | 0.02    |
| Hemoglobin (g/dl)                         | 10.7 (10.1, 11.3) | 10.4 (9.8, 11.0) | 0.04    | 10.7 (10.2, 11.4) | 10.7 (10.0, 11.2) | 0.4     | 10.7 (10.1, 11.2) | 10.7 (10.0, 11.3) | >0.9    |
| Platelet count ( $\times 10^9/L$ )        | 218 (173, 261)    | 202 (163, 255)   | 0.3     | 222 (171, 279)    | 215 (172, 257)    | 0.5     | 219 (174, 258)    | 212 (168, 260)    | 0.7     |
| MPV (fL)                                  | 9.7 (9.0, 10.5)   | 10.1 (9.4, 11.0) | 0.03    | 9.8 (9.2, 10.7)   | 9.8 (9.1, 10.5)   | 0.8     | 9.8 (9.0, 10.6)   | 9.7 (9.1, 10.4)   | 0.8     |
| WBC ( $\times 10^9/L$ )                   | 6.6 (5.1, 8.0)    | 6.8 (5.5, 8.5)   | 0.5     | 6.7 (5.2, 8.6)    | 6.6 (5.2, 8.0)    | 0.7     | 6.4 (5.1, 8.0)    | 6.8 (5.6, 8.3)    | 0.04    |
| TIBC (mcg/dl)                             | 221 (196, 251)    | 203 (188, 220)   | 0.1     | 225 (197, 251)    | 220 (194, 249)    | 0.5     | 221 (196, 251)    | 220 (195, 248)    | 0.5     |
| Ferritin (ng/ml)                          | 682 (420, 908)    | 705 (567, 937)   | 0.5     | 603 (415, 854)    | 722 (441, 933)    | 0.05    | 700 (419, 906)    | 665 (454, 913)    | 0.9     |

|                           |                      |                      |       |                      |                      |      |                      |                      |       |
|---------------------------|----------------------|----------------------|-------|----------------------|----------------------|------|----------------------|----------------------|-------|
| nPCR (g/kg/day)           | 1.0 (0.8, 1.2)       | 1.0 (0.8, 1.2)       | >0.9  | 1.0 (0.8, 1.2)       | 1.0 (0.9, 1.2)       | 0.3  | 1.0 (0.9, 1.2)       | 1.0 (0.8, 1.2)       | 0.01  |
| Glucose (mg/dl)           | 135<br>(97, 187)     | 154<br>(97, 220)     | 0.3   | 136<br>(105., 202)   | 137<br>(97, 193)     | 0.6  | 131<br>(92, 185)     | 145<br>(107, 212)    | 0.03  |
| HbA1c (%)                 | 6.1 (5.5, 7.1)       | 5.8 (5.0, 6.8)       | 0.5   | 5.9 (5.4, 7.2)       | 6.2 (5.6, 7.0)       | 0.2  | 6.1 (5.5, 7.2)       | 6.2 (5.5, 6.9)       | 0.4   |
| Cholesterol (mg/dl)       | 137<br>(118, 166)    | 154<br>(136, 191)    | 0.2   | 138<br>(119, 168)    | 153<br>(127, 177)    | 0.5  | 137<br>(113, 165)    | 144<br>(127, 177)    | 0.2   |
| HDL (mg/dl)               | 38 (31, 50)          | 48 (36, 65)          | 0.2   | 38 (31, 50)          | 48 (36, 65)          | 0.2  | 38 (30, 49)          | 39 (33, 50)          | 0.3   |
| LDL (mg/dl)               | 66 (50, 88)          | 83 (59, 107)         | 0.3   | 66 (50, 88)          | 83 (59, 107)         | 0.3  | 64 (47, 85)          | 73 (57, 98)          | 0.1   |
| TG (mg/dl)                | 131<br>(93, 184)     | 129<br>(83, 180)     | 0.7   | 133<br>(94, 185)     | 98<br>(78, 162)      | 0.2  | 127<br>(87, 198)     | 131<br>(96, 177)     | 0.8   |
| <b>BODY ANTHROPOMETRY</b> |                      |                      |       |                      |                      |      |                      |                      |       |
| <b>Median (IQR)</b>       |                      |                      |       |                      |                      |      |                      |                      |       |
| BMI (kg/m <sup>2</sup> )  | 26.5<br>(23.1, 31.9) | 26.1<br>(23.2, 29.4) | 0.2   | 26.5<br>(23.2, 31.8) | 26.2<br>(23.1, 31.4) | 0.7  | 26.4<br>(23.1, 31.7) | 26.2<br>(23.5, 30.4) | 0.9   |
| Waist circ. (cm)          | 97 (86, 109)         | 93 (84, 100)         | 0.01  | 97 (87, 105)         | 95 (84, 107)         | 0.5  | 97 (85, 110)         | 93 (84, 101)         | 0.01  |
| Biceps SF (mm)            | 11.2<br>(6.3, 19.7)  | 11.0<br>(7.3, 19.3)  | >0.9  | 11.0<br>(6.7, 8.3)   | 11.0<br>(6.3, 19.8)  | >0.9 | 10.7<br>(6.0, 19.7)  | 12.0<br>(8.0, 19.7)  | 0.2   |
| Triceps SF (mm)           | 12.7<br>(7.7, 18.7)  | 12.0<br>(8.7, 17.7)  | 0.9   | 12.2<br>(6.7, 18.5)  | 12.7<br>(8.0, 18.5)  | 0.3  | 11.0<br>(6.7, 17.3)  | 13.3<br>(9.0, 19.7)  | 0.007 |
| NIR body fat %            | 29.6<br>(22.2, 38.6) | 26.6<br>(19.2, 34.7) | 0.008 | 29.8<br>(22.3, 38.9) | 28.0<br>(20.9, 37.3) | 0.4  | 28.0<br>(21.7, 38.4) | 29.1<br>(20.7, 37.3) | 0.8   |
| Mid-arm circ. (mm)        | 310<br>(275, 342)    | 300<br>(270, 323)    | 0.06  | 300<br>(276, 333)    | 305<br>(275, 345)    | 0.3  | 309<br>(275, 345)    | 305<br>(270, 335)    | 0.2   |
| Mid-arm muscle circ. (mm) | 269<br>(240, 300)    | 256<br>(235, 284)    | 0.02  | 260<br>(238, 292)    | 266<br>(240, 294)    | 0.3  | 271<br>(241, 302)    | 258<br>(235, 284)    | 0.007 |

<sup>1</sup>P-value calculated by t-test, chi-square, or Wilcoxon Rank sum tests.

<sup>2</sup>Calcium level corrected for serum albumin.

<sup>3</sup>Abbreviations: AVF, arteriovenous fistula; AVG, arteriovenous graft; circ, circumference; BMI, body mass index; PTH, parathyroid hormone; MPV, mean platelet volume; WBC, white blood cell count; TIBC, total iron binding capacity; nPCR, normal protein catabolic rate; HbA1c, hemoglobin A1c; HDL, high density lipoprotein; LDL, low density lipoprotein; TG, triglyceride; SF, skinfold; NIR, near-infrared
