# Supplementary material
Source: PubMed Central journal article supplement (PMC4516594)
Supplement: NIHMS668562-supplement-3.pdf [file NIHMS668562-supplement-3.pdf]

**Table S2. Unadjusted and Multivariable-Adjusted Pearson Correlation Coefficients (R) of Adiponectin and Other Relevant Covariates in Maintenance Hemodialysis Patients.**

| Variable                             | Unadjusted   |         | Case-Mix Adjusted <sup>1</sup> |         | Case-Mix + Laboratory Adjusted <sup>2</sup> |         |
|--------------------------------------|--------------|---------|--------------------------------|---------|---------------------------------------------|---------|
|                                      | R            | p-value | R                              | p-value | R                                           | p-value |
| Age                                  | 0.12         | 0.008*  | 0.13                           | 0.005*  | 0.08                                        | 0.09    |
| Vintage                              | 0.12         | 0.009*  | 0.11                           | 0.01*   | 0.09                                        | 0.06    |
| <b>LABORATORY TESTS</b>              |              |         |                                |         |                                             |         |
| Serum albumin (g/dl)                 | -0.09        | 0.06    | -0.05                          | 0.3     | -0.07                                       | 0.2     |
| Creatinine (mg/dl)                   | -0.08        | 0.1     | -0.03                          | 0.6     | -0.04                                       | 0.4     |
| Calcium <sup>3</sup> (mg/dl)         | 0.01         | 0.9     | -0.03                          | 0.5     | -0.02                                       | 0.7     |
| Phosphorus (mg/dl)                   | 0.00         | >0.9    | 0.04                           | 0.4     | 0.05                                        | 0.4     |
| PTH (pg/ml)                          | 0.00         | >0.9    | 0.02                           | 0.7     | 0.00                                        | >0.9    |
| Hemoglobin (g/dl)                    | 0.03         | 0.5     | 0.01                           | 0.8     | 0.02                                        | 0.7     |
| WBC (x10 <sup>9</sup> /L)            | <b>-0.23</b> | <0.001* | <b>-0.22</b>                   | <0.001* | <b>-0.22</b>                                | <0.001* |
| Platelet count (x10 <sup>9</sup> /L) | -0.19        | <0.001* | -0.16                          | 0.001*  | -0.04                                       | 0.4     |
| MPV (fL)                             | 0.02         | 0.7     | 0.00                           | >0.9    | -0.03                                       | 0.5     |
| TIBC (mcg/dl)                        | -0.07        | 0.2     | -0.04                          | 0.4     | -0.04                                       | 0.4     |
| Ferritin (ng/ml)                     | 0.02         | 0.7     | -0.03                          | 0.6     | 0.00                                        | >0.9    |
| nPCR (g/kg/day)                      | 0.06         | 0.2     | 0.06                           | 0.3     | 0.08                                        | 0.1     |
| Glucose (mg/dl)                      | -0.03        | 0.7     | -0.05                          | 0.5     | -0.05                                       | 0.5     |
| HbA1c (%)                            | -0.06        | 0.4     | -0.03                          | 0.7     | -0.03                                       | 0.7     |
| Cholesterol (mg/dl)                  | -0.03        | 0.7     | -0.07                          | 0.5     | -0.09                                       | 0.3     |
| HDL (mg/dl)                          | <b>0.37</b>  | <0.001* | <b>0.33</b>                    | <0.001* | <b>0.31</b>                                 | 0.001*  |
| LDL (mg/dl)                          | -0.08        | 0.4     | -0.12                          | 0.2     | -0.17                                       | 0.09    |
| TG (mg/dl)                           | <b>-0.30</b> | <0.001* | <b>-0.25</b>                   | 0.006*  | <b>-0.21</b>                                | 0.03    |
| <b>BODY ANTHROPOMETRY</b>            |              |         |                                |         |                                             |         |
| BMI (kg/m <sup>2</sup> )             | <b>-0.26</b> | <0.001* | <b>-0.30</b>                   | <0.001* | <b>-0.26</b>                                | <0.001* |
| Waist circ. (cm)                     | <b>-0.27</b> | <0.001* | <b>-0.31</b>                   | <0.001* | <b>-0.30</b>                                | <0.001* |
| Biceps SF (mm)                       | -0.15        | 0.003*  | <b>-0.20</b>                   | <0.001* | -0.16                                       | 0.002*  |
| Triceps SF (mm)                      | -0.11        | 0.03    | -0.18                          | <0.001* | -0.15                                       | 0.004*  |
| NIR body fat %                       | -0.12        | 0.02*   | <b>-0.29</b>                   | <0.001* | <b>-0.27</b>                                | <0.001* |
| Mid-arm circ. (mm)                   | <b>-0.23</b> | <0.001* | <b>-0.26</b>                   | <0.001* | <b>-0.22</b>                                | <0.001* |
| Mid-arm muscle circ. (mm)            | <b>-0.20</b> | <0.001* | -0.18                          | <0.001* | -0.16                                       | 0.002*  |

<sup>1</sup>Case-mix analyses adjusted for age, sex, race, ethnicity, and vintage.

<sup>2</sup>Case-mix + laboratory analyses adjusted for age, sex, race, ethnicity, vintage, diabetes, serum albumin, serum TIBC, serum creatinine, WBC, phosphorus, hemoglobin, and nPCR.

<sup>3</sup>Calcium level corrected for serum albumin.

<sup>4</sup>Bold=Correlation coefficient  $\geq 0.20$ ; \*Adjusted p-value  $< 0.05$  using false discovery rate method to account for multiplicity of comparisons.

<sup>5</sup>Abbreviations: AVF, arteriovenous fistula; AVG, arteriovenous graft; waist circ, waist circumference; BMI, body mass index; PTH, parathyroid hormone; MPV, mean platelet volume; WBC, white blood cell count; TIBC, total iron binding capacity; nPCR, normal protein catabolic rate; HbA1c, hemoglobin A1c; HDL, high density lipoprotein; LDL, low density lipoprotein; TG, triglyceride; SF, skinfold; NIR, near-infrared.
