# Supplementary material
Source: PubMed Central journal article supplement (PMC4516594)
Supplement: NIHMS668562-supplement-4.pdf [file NIHMS668562-supplement-4.pdf]

**Table S3. Association between Demographic, Clinical, and Laboratory Measures and High Adiponectin Level (>50<sup>th</sup> percentile) Using Logistic Regression.**

| Variable                                 | Unadjusted               |                   | Case-Mix Adjusted <sup>1</sup> |               | Case-Mix + Laboratory Adjusted <sup>2</sup> |                   |
|------------------------------------------|--------------------------|-------------------|--------------------------------|---------------|---------------------------------------------|-------------------|
|                                          | OR (95% CI)              | p-value           | OR (95% CI)                    | p-value       | OR (95% CI)                                 | p-value           |
| Age (Δ10 years)                          | 1.08 (0.96-1.22)         | 0.2               | 1.11 (0.98-1.26)               | 0.1           | 1.02 (0.88-1.18)                            | 0.8               |
| Vintage                                  | <b>1.08 (1.03-1.12)</b>  | <b>0.001*</b>     | <b>1.08 (1.03-1.13)</b>        | <b>0.002*</b> | <b>1.07 (1.02-1.12)</b>                     | <b>0.005*</b>     |
| Female                                   | <b>1.52 (1.06-2.16)</b>  | <b>0.02*</b>      | <b>1.45 (1.01-2.08)</b>        | <b>0.05</b>   | 1.37 (0.93-2.01)                            | 0.1               |
| Black race                               | 0.81 (0.57-1.16)         | 0.3               | 0.93 (0.56-1.54)               | 0.8           | 0.94 (0.54-1.62)                            | 0.8               |
| Hispanic                                 | 1.31 (0.92-1.86)         | 0.1               | 1.28 (0.77-2.14)               | 0.3           | 1.22 (0.72-2.07)                            | 0.5               |
| Diabetes                                 | 1.02 (0.72-1.46)         | 0.9               | 1.00 (0.68-1.47)               | >0.9          | 1.05 (0.70-1.58)                            | 0.8               |
| AVF/AVG                                  | 0.82 (0.58- 1.16)        | 0.3               | 0.79 (0.55-1.13)               | 0.2           | 0.82 (0.56-1.19)                            | 0.3               |
| Smoking                                  | 1.20 (0.83-1.73)         | 0.3               | 1.30 (0.89-1.90)               | 0.2           | 1.33 (0.90-1.97)                            | 0.2               |
| <b>LABORATORY TESTS</b>                  |                          |                   |                                |               |                                             |                   |
| Serum albumin (Δ0.5 g/dl)                | <b>0.73 (0.55-0.97)</b>  | <b>0.03</b>       | 0.78 (0.58-1.05)               | 0.1           | 0.77 (0.56-1.08)                            | 0.1               |
| Creatinine (mg/dl)                       | <b>0.94 (0.88-1.00)</b>  | <b>0.05</b>       | 0.95 (0.87-1.03)               | 0.2           | 0.94 (0.86-1.04)                            | 0.2               |
| Calcium <sup>3</sup> (mg/dl)             | 1.07 (0.81-1.42)         | 0.6               | 0.99 (0.74-1.33)               | >0.9          | 1.04 (0.77-1.42)                            | 0.8               |
| Phosphorus (mg/dl)                       | 0.96 (0.85-1.09)         | 0.6               | 1.00 (0.88-1.15)               | >0.9          | 1.03 (0.89-1.19)                            | 0.7               |
| PTH (pg/ml)                              | 1.00 (1.00-1.00)         | 0.3               | 1.00 (1.00-1.00)               | 0.5           | 1.00 (1.00-1.00)                            | 0.4               |
| WBC (x10 <sup>9</sup> /L)                | <b>0.86 (0.78-0.93)</b>  | <b>0.001*</b>     | <b>0.85 (0.78-0.94)</b>        | <b>0.001*</b> | <b>0.85 (0.77-0.93)</b>                     | <b>&lt;0.001*</b> |
| Hemoglobin (g/dl)                        | 1.00 (0.83-1.21)         | >0.9              | 0.96 (0.78-1.16)               | 0.7           | 0.98 (0.79-1.20)                            | 0.8               |
| Platelet count (Δ50 x10 <sup>9</sup> /L) | <b>0.77 (0.67-0.88)</b>  | <b>&lt;0.001*</b> | <b>0.78 (0.68-0.90)</b>        | <b>0.001*</b> | 0.84 (0.71-1.01)                            | 0.06              |
| MPV (fL)                                 | 1.15 (0.96-1.37)         | 0.1               | 1.12 (0.93-1.34)               | 0.2           | 1.06 (0.87-1.28)                            | 0.6               |
| TIBC (Δ50 mcg/dl)                        | <b>0.75 (0.58-0.97)</b>  | <b>0.03</b>       | 0.79 (0.60-1.03)               | 0.08          | 0.80 (0.60-1.07)                            | 0.1               |
| Ferritin (ng/ml)                         | 1.00 (1.00-1.00)         | 0.8               | 1.00 (1.00-1.00)               | 0.3           | 1.00 (1.00-1.00)                            | 0.4               |
| nPCR (g/kg/day)                          | 1.28 (0.64-2.56)         | 0.5               | 1.17 (0.56-2.44)               | 0.7           | 1.61 (0.73-3.55)                            | 0.2               |
| HbA1c (%)                                | 0.95 (0.78-1.15)         | 0.6               | 0.99 (0.79-1.22)               | 0.9           | 0.98 (0.78-1.24)                            | 0.9               |
| Glucose (mg/dl)                          | 1.00 (1.00-1.00)         | 0.8               | 1.00 (1.00-1.00)               | >0.9          | 1.00 (1.00-1.00)                            | 0.9               |
| Cholesterol (Δ50 mg/dl)                  | 0.69 (0.42-1.13)         | 0.1               | 0.59 (0.34-1.04)               | 0.07          | <b>0.48 (0.25-0.94)</b>                     | <b>0.03</b>       |
| HDL (Δ10 mg/dl)                          | <b>1.73 (1.27- 2.36)</b> | <b>0.001*</b>     | <b>1.81 (1.27-2.59)</b>        | <b>0.001*</b> | <b>1.87 (1.27-2.74)</b>                     | <b>0.001*</b>     |
| TG (Δ50 mg/dl)                           | <b>0.59 (0.44-0.79)</b>  | <b>&lt;0.001*</b> | <b>0.62 (0.46-0.84)</b>        | <b>0.002*</b> | <b>0.60 (0.44-0.83)</b>                     | <b>0.002*</b>     |
| LDL (Δ25 mg/dl)                          | 0.76 (0.55-1.06)         | 0.1               | <b>0.68 (0.46-0.99)</b>        | <b>0.05</b>   | <b>0.61 (0.40-0.93)</b>                     | <b>0.02</b>       |

| <b>BODY ANTHROPOMETRY</b>                 |                         |                   |                         |                   |                         |                   |
|-------------------------------------------|-------------------------|-------------------|-------------------------|-------------------|-------------------------|-------------------|
| BMI<br>( $\Delta 5$ kg/m <sup>2</sup> )   | <b>0.60 (0.50-0.72)</b> | <b>&lt;0.001*</b> | <b>0.89 (0.86-0.93)</b> | <b>&lt;0.001*</b> | <b>0.56 (0.46-0.60)</b> | <b>&lt;0.001*</b> |
| Waist circ.<br>( $\Delta 5$ cm)           | <b>0.82 (0.77-0.89)</b> | <b>&lt;0.001*</b> | <b>0.78 (0.72-0.85)</b> | <b>&lt;0.001*</b> | <b>0.78 (0.72-0.85)</b> | <b>&lt;0.001*</b> |
| Biceps SF<br>( $\Delta 10$ mm)            | <b>0.72 (0.58-0.88)</b> | <b>0.002*</b>     | <b>0.64 (0.51-0.80)</b> | <b>&lt;0.001*</b> | <b>0.69 (0.54-0.88)</b> | <b>0.003*</b>     |
| Triceps SF<br>( $\Delta 10$ mm)           | <b>0.78 (0.65-0.93)</b> | <b>0.005*</b>     | <b>0.69 (0.57-0.84)</b> | <b>&lt;0.001*</b> | <b>0.73 (0.59-0.89)</b> | <b>0.003*</b>     |
| NIR body fat<br>( $\Delta 5\%$ )          | <b>0.85 (0.77-0.93)</b> | <b>0.001*</b>     | <b>0.64 (0.56-0.75)</b> | <b>&lt;0.001*</b> | <b>0.66 (0.57-0.77)</b> | <b>&lt;0.001*</b> |
| Mid-arm circ.<br>( $\Delta 10$ mm)        | <b>0.37 (0.25-0.54)</b> | <b>&lt;0.001*</b> | <b>0.32 (0.21-0.48)</b> | <b>&lt;0.001*</b> | <b>0.35 (0.23-0.53)</b> | <b>&lt;0.001*</b> |
| Mid-arm muscle<br>circ. ( $\Delta 10$ mm) | <b>0.91 (0.87-0.95)</b> | <b>&lt;0.001*</b> | <b>0.91 (0.86-0.95)</b> | <b>&lt;0.001*</b> | <b>0.91 (0.87-0.96)</b> | <b>&lt;0.001*</b> |

<sup>1</sup>Case-mix analyses adjusted for age, sex, race, ethnicity, and vintage.

<sup>2</sup>Case-mix + laboratory analyses adjusted for age, sex, race, ethnicity, vintage, diabetes, serum albumin, serum TIBC, serum creatinine, WBC, phosphorus, hemoglobin, and nPCR.

<sup>3</sup>Calcium level corrected for serum albumin.

<sup>4</sup>Bold=Significant association with high adiponectin; \*Adjusted p-value <0.05 using the false discovery rate method to account for multiplicity of comparisons.

<sup>5</sup>Abbreviations: AVF, arteriovenous fistula; AVG, arteriovenous graft; waist circ, waist circumference; BMI, body mass index; PTH, parathyroid hormone; MPV, mean platelet volume; WBC, white blood cell count; TIBC, total iron binding capacity; nPCR, normal protein catabolic rate; HbA1c, hemoglobin A1c; HDL, high density lipoprotein; LDL, low density lipoprotein; TG, triglyceride; SF, skinfold; NIR, near-infrared
